# Supplementary material
Source: HighWire-hosted journal article supplement (https://bmjopensem.bmj.com/content/suppl/2022/09/15/8.3.e001413)
Supplement: bmjsem-2022-001413supp001_data_supplement.pdf [file bmjsem-2022-001413supp001_data_supplement.pdf]

**THE CAIT QUESTIONNAIRE**

請為以下每條問題選擇最能描述您足踝情況的一項。

|                                     | 左                        | 右                        | 分數 |
|-------------------------------------|--------------------------|--------------------------|----|
| <b>1. 我的足踝感到痛。</b>                  |                          |                          |    |
| 從不                                  | <input type="checkbox"/> | <input type="checkbox"/> | 5  |
| 做運動時                                | <input type="checkbox"/> | <input type="checkbox"/> | 4  |
| 在 <u>凹凸不平</u> 的路面跑步時                | <input type="checkbox"/> | <input type="checkbox"/> | 3  |
| 在 <u>平坦</u> 的路面跑步時                  | <input type="checkbox"/> | <input type="checkbox"/> | 2  |
| 在 <u>凹凸不平</u> 的路面步行時                | <input type="checkbox"/> | <input type="checkbox"/> | 1  |
| 在 <u>平坦</u> 的路面步行時                  | <input type="checkbox"/> | <input type="checkbox"/> | 0  |
| <b>2. 我感到足踝關節不穩。</b>                |                          |                          |    |
| 從不                                  | <input type="checkbox"/> | <input type="checkbox"/> | 4  |
| 做運動時， <u>間中</u> 發生（不是每次）            | <input type="checkbox"/> | <input type="checkbox"/> | 3  |
| 做運動時， <u>經常</u> 發生（每次）              | <input type="checkbox"/> | <input type="checkbox"/> | 2  |
| 日常活動時， <u>間中</u> 發生                 | <input type="checkbox"/> | <input type="checkbox"/> | 1  |
| 日常活動時， <u>經常</u> 發生                 | <input type="checkbox"/> | <input type="checkbox"/> | 0  |
| <b>3. 當我<u>急速轉彎</u>時，我感到足踝關節不穩。</b> |                          |                          |    |
| 從不                                  | <input type="checkbox"/> | <input type="checkbox"/> | 3  |
| 跑步時， <u>間中</u> 發生                   | <input type="checkbox"/> | <input type="checkbox"/> | 2  |
| 跑步時， <u>經常</u> 發生                   | <input type="checkbox"/> | <input type="checkbox"/> | 1  |
| 步行時發生                               | <input type="checkbox"/> | <input type="checkbox"/> | 0  |
| <b>4. 當我<u>落樓梯</u>時，我感到足踝關節不穩。</b>  |                          |                          |    |
| 從不                                  | <input type="checkbox"/> | <input type="checkbox"/> | 3  |
| 如果我急步行                              | <input type="checkbox"/> | <input type="checkbox"/> | 2  |
| <u>間中</u> 發生                        | <input type="checkbox"/> | <input type="checkbox"/> | 1  |
| <u>經常</u> 發生                        | <input type="checkbox"/> | <input type="checkbox"/> | 0  |
| <b>5. 當我<u>單腳站立</u>，我感到足踝關節不穩。</b>  |                          |                          |    |
| 從不                                  | <input type="checkbox"/> | <input type="checkbox"/> | 2  |
| 用 <u>腳尖</u> 時                       | <input type="checkbox"/> | <input type="checkbox"/> | 1  |
| <u>腳板貼地</u> 時                       | <input type="checkbox"/> | <input type="checkbox"/> | 0  |
| <b>6. 當我 _____ 時，我感到足踝關節不穩。</b>     |                          |                          |    |
| 從不                                  | <input type="checkbox"/> | <input type="checkbox"/> | 3  |
| <u>單腳左右跳動</u>                       | <input type="checkbox"/> | <input type="checkbox"/> | 2  |
| <u>單腳原地跳動</u>                       | <input type="checkbox"/> | <input type="checkbox"/> | 1  |
| <u>雙腳跳高</u>                         | <input type="checkbox"/> | <input type="checkbox"/> | 0  |
| <b>7. 當我 _____ 時，我感到足踝關節不穩。</b>     |                          |                          |    |
| 從不                                  | <input type="checkbox"/> | <input type="checkbox"/> | 4  |

|            |                          |                          |   |
|------------|--------------------------|--------------------------|---|
| 在凹凸不平的路面跑步 | <input type="checkbox"/> | <input type="checkbox"/> | 3 |
| 在凹凸不平的路面慢跑 | <input type="checkbox"/> | <input type="checkbox"/> | 2 |
| 在凹凸不平的路面步行 | <input type="checkbox"/> | <input type="checkbox"/> | 1 |
| 在平坦的路面步行   | <input type="checkbox"/> | <input type="checkbox"/> | 0 |

8. 一般來說，當我的足踝快要扭轉 (俗稱, 拗柴) 時，我\_\_\_\_\_能夠阻止事情發生。

|           |                          |                          |   |
|-----------|--------------------------|--------------------------|---|
| 立即        | <input type="checkbox"/> | <input type="checkbox"/> | 3 |
| 經常        | <input type="checkbox"/> | <input type="checkbox"/> | 2 |
| 間中        | <input type="checkbox"/> | <input type="checkbox"/> | 1 |
| 不(能)      | <input type="checkbox"/> | <input type="checkbox"/> | 0 |
| 我從來沒有扭轉足踝 | <input type="checkbox"/> | <input type="checkbox"/> | 3 |

9. 通常扭轉足踝後，我的足踝\_\_\_\_\_回復正常。

|           |                          |                          |   |
|-----------|--------------------------|--------------------------|---|
| 幾乎立即      | <input type="checkbox"/> | <input type="checkbox"/> | 3 |
| 一天之內      | <input type="checkbox"/> | <input type="checkbox"/> | 2 |
| 一至兩天      | <input type="checkbox"/> | <input type="checkbox"/> | 1 |
| 超過兩天      | <input type="checkbox"/> | <input type="checkbox"/> | 0 |
| 我從來沒有扭轉足踝 | <input type="checkbox"/> | <input type="checkbox"/> | 3 |

---
